# Supplementary material
Source: PubMed Central journal article supplement (PMC3818491)
Supplement: NIHMS494869-supplement-Supplemental_Material.pdf [file NIHMS494869-supplement-Supplemental_Material.pdf]

**SUPPLEMENTARY MATHERIAL**

**Supplementary Table 1.** Overall statistical power of the study for each analysed *IRAK1/MECP2* genetic variant at the 5% significance level accordingly with global disease, diffuse cutaneous systemic sclerosis and pulmonary fibrosis.

| <i>Global SSc</i> |        |        |        |        |        |
|-------------------|--------|--------|--------|--------|--------|
| SNP               | OR=1.1 | OR=1.2 | OR=1.3 | OR=1.4 | OR=1.5 |
| rs1059702         | 0.55   | 0.97   | 1.00   | 1.00   | 1.00   |
| rs3027935         | 0.19   | 0.55   | 0.86   | 0.97   | 1.00   |
| rs17435           | 0.61   | 0.98   | 1.00   | 1.00   | 1.00   |
| rs5987201         | 0.19   | 0.55   | 0.86   | 0.97   | 1.00   |
| rs5945175         | 0.26   | 0.71   | 0.95   | 0.99   | 1.00   |
| <i>dcSSc</i>      |        |        |        |        |        |
| SNP               | OR=1.1 | OR=1.2 | OR=1.3 | OR=1.4 | OR=1.5 |
| rs1059702         | 0.25   | 0.69   | 0.94   | 0.99   | 1.00   |
| rs3027935         | 0.10   | 0.27   | 0.51   | 0.74   | 0.89   |
| rs17435           | 0.32   | 0.81   | 0.98   | 1.00   | 1.00   |
| rs5987201         | 0.10   | 0.27   | 0.51   | 0.74   | 0.89   |
| rs5945175         | 0.13   | 0.38   | 0.68   | 0.88   | 0.96   |
| <i>PF</i>         |        |        |        |        |        |
| SNP               | OR=1.1 | OR=1.2 | OR=1.3 | OR=1.4 | OR=1.5 |
| rs1059702         | 0.16   | 0.48   | 0.81   | 0.95   | 0.99   |
| rs3027935         | 0.08   | 0.17   | 0.32   | 0.50   | 0.68   |
| rs17435           | 0.21   | 0.60   | 0.89   | 0.98   | 1.00   |
| rs5987201         | 0.08   | 0.17   | 0.32   | 0.50   | 0.68   |
| rs5945175         | 0.09   | 0.24   | 0.45   | 0.67   | 0.84   |

SSc, systemic sclerosis; dcSSc, diffuse cutaneous systemic sclerosis; PF, pulmonary fibrosis; SNP, single-nucleotide polymorphism; OR, odds ratio.

**Supplementary Table 2.** Hardy-Weinberg *P*-values of the analysed polymorphisms in the control cohorts included in the study.

| SNP       | Spain | USA   | Germany | The Netherlands | UK    |
|-----------|-------|-------|---------|-----------------|-------|
| rs1059702 | 0.090 | 0.012 | 0.420   | 0.223           | 0.697 |
| rs3027935 | 0.001 | 0.642 | 0.604   | 1.000           | 1.000 |
| rs17435   | 0.185 | 0.138 | 0.144   | 0.838           | 0.583 |
| rs5987201 | 0.394 | 0.189 | 1.000   | 1.000           | 0.130 |
| rs5945175 | 0.529 | 1.000 | 1.000   | 0.187           | 1.000 |

SNP, single-nucleotide polymorphism.

**Supplementary Table 3.** Genotype and minor allele frequencies (MAF) of Xq28 genetic variants in Caucasian systemic sclerosis patients and unaffected controls from Spain.

| Locus           | rs#       | Gene  | 1/2 | Subgroup (N)      | Genotype, N (%) |             |              | MAF (%) | Allele test     |                     |                  |
|-----------------|-----------|-------|-----|-------------------|-----------------|-------------|--------------|---------|-----------------|---------------------|------------------|
|                 |           |       |     |                   | 1/1             | 1/2         | 2/2          |         | P-value*        | P <sub>FDR</sub> ** | OR [CI 95%]***   |
| ChrX: 152937386 | rs1059702 | IRAK1 | A/G | Controls (n=1449) | 39 (2.69)       | 344 (23.74) | 1066 (73.57) | 14.56   |                 |                     |                  |
|                 |           |       |     | SSc (n=997)       | 37 (3.71)       | 254 (25.48) | 706 (70.81)  | 16.45   | 0.072           | 0.096               | 1.16 [0.99-1.35] |
|                 |           |       |     | lcSSc (n=691)     | 24 (3.47)       | 166 (24.02) | 501 (72.50)  | 15.48   | 0.427           | 0.427               | 1.08 [0.90-1.29] |
|                 |           |       |     | dcSSc (n=306)     | 13 (4.25)       | 88 (28.76)  | 205 (66.99)  | 18.63   | <b>0.011</b>    | <b>0.028</b>        | 1.34 [1.07-1.69] |
|                 |           |       |     | ACA+ (n=470)      | 11 (2.34)       | 113 (24.04) | 346 (73.62)  | 14.36   | 0.880           | 0.880               | 0.98 [0.80-1.21] |
|                 |           |       |     | ATA+ (n=220)      | 8 (3.64)        | 61 (27.73)  | 151 (68.64)  | 17.50   | 0.107           | 0.399               | 1.25 [0.95-1.63] |
|                 |           |       |     | PF+ (n=216)       | 11 (5.09)       | 59 (27.31)  | 146 (67.59)  | 18.75   | <b>0.023</b>    | 0.058               | 1.35 [1.04-1.76] |
| ChrX: 152957662 | rs3027935 | MECP2 | T/C | Controls (n=1471) | 10 (0.68)       | 111 (7.55)  | 1350 (91.77) | 4.45    |                 |                     |                  |
|                 |           |       |     | SSc (n=1005)      | 4 (0.40)        | 95 (9.45)   | 906 (90.15)  | 5.12    | 0.274           | 0.274               | 1.16 [0.89-1.51] |
|                 |           |       |     | lcSSc (n=701)     | 2 (0.29)        | 70 (9.99)   | 629 (89.73)  | 5.28    | 0.230           | 0.288               | 1.20 [0.89-1.60] |
|                 |           |       |     | dcSSc (n=304)     | 2 (0.66)        | 25 (8.22)   | 277 (91.12)  | 4.77    | 0.732           | 0.732               | 1.08 [0.71-1.62] |
|                 |           |       |     | ACA+ (n=470)      | 1 (0.21)        | 51 (10.85)  | 418 (88.94)  | 5.64    | 0.136           | 0.227               | 1.28 [0.92-1.78] |
|                 |           |       |     | ATA+ (n=220)      | 1 (0.45)        | 13 (5.91)   | 206 (93.64)  | 3.41    | 0.315           | 0.525               | 0.76 [0.44-1.31] |
|                 |           |       |     | PF+ (n=220)       | 2 (0.91)        | 19 (8.64)   | 199 (90.45)  | 5.23    | 0.467           | 0.584               | 1.18 [0.75-1.87] |
| ChrX: 152965174 | rs17435   | MECP2 | T/A | Controls (n=1423) | 56 (3.94)       | 412 (28.95) | 955 (67.11)  | 18.41   |                 |                     |                  |
|                 |           |       |     | SSc (n=1003)      | 56 (5.58)       | 327 (32.60) | 620 (61.81)  | 21.88   | <b>2.82E-03</b> | <b>0.014</b>        | 1.24 [1.08-1.43] |
|                 |           |       |     | lcSSc (n=699)     | 36 (5.15)       | 223 (31.90) | 440 (62.95)  | 21.10   | <b>0.037</b>    | 0.111               | 1.19 [1.01-1.39] |
|                 |           |       |     | dcSSc (n=304)     | 20 (6.58)       | 104 (34.21) | 180 (59.21)  | 23.68   | <b>2.81E-03</b> | <b>0.014</b>        | 1.38 [1.12-1.70] |
|                 |           |       |     | ACA+ (n=469)      | 19 (4.05)       | 146 (31.13) | 304 (64.82)  | 19.62   | 0.412           | 0.515               | 1.08 [0.90-1.30] |
|                 |           |       |     | ATA+ (n=219)      | 11 (5.02)       | 71 (32.42)  | 137 (62.56)  | 21.23   | 0.159           | 0.399               | 1.20 [0.93-1.53] |
|                 |           |       |     | PF+ (n=220)       | 17 (7.73)       | 70 (31.82)  | 133 (60.45)  | 23.64   | <b>9.49E-03</b> | <b>0.047</b>        | 1.37 [1.08-1.74] |
| ChrX: 152983236 | rs5987201 | MECP2 | T/C | Controls (n=1355) | 2 (0.15)        | 82 (6.05)   | 1271 (93.80) | 3.17    |                 |                     |                  |
|                 |           |       |     | SSc (n=1002)      | 2 (0.20)        | 79 (7.88)   | 921 (91.92)  | 4.14    | 0.077           | 0.096               | 1.32 [0.97-1.79] |
|                 |           |       |     | lcSSc (n=702)     | 2 (0.28)        | 55 (7.83)   | 645 (91.88)  | 4.20    | 0.090           | 0.150               | 1.34 [0.95-1.88] |
|                 |           |       |     | dcSSc (n=300)     | 0 (0.00)        | 24 (8.00)   | 276 (92.00)  | 4.00    | 0.307           | 0.383               | 1.27 [0.80-2.02] |
|                 |           |       |     | ACA+ (n=471)      | 1 (0.21)        | 42 (8.92)   | 428 (90.87)  | 4.67    | <b>0.033</b>    | 0.132               | 1.50 [1.03-2.17] |
|                 |           |       |     | ATA+ (n=216)      | 1 (0.46)        | 11 (5.09)   | 204 (94.44)  | 3.01    | 0.856           | 0.856               | 0.95 [0.52-1.71] |
|                 |           |       |     | PF+ (n=215)       | 0 (0.00)        | 15 (6.98)   | 200 (93.02)  | 3.49    | 0.731           | 0.731               | 1.10 [0.63-1.93] |
| ChrX: 153011951 | rs5945175 | MECP2 | C/T | Controls (n=1456) | 1 (0.07)        | 64 (4.40)   | 1391 (95.54) | 2.27    |                 |                     |                  |
|                 |           |       |     | SSc (n=999)       | 1 (0.10)        | 65 (6.51)   | 933 (93.39)  | 3.35    | <b>0.021</b>    | 0.053               | 1.50 [1.06-2.11] |
|                 |           |       |     | lcSSc (n=695)     | 0 (0.00)        | 46 (6.62)   | 649 (93.38)  | 3.31    | <b>0.045</b>    | 0.111               | 1.48 [1.01-2.16] |
|                 |           |       |     | dcSSc (n=304)     | 1 (0.33)        | 19 (6.25)   | 284 (93.42)  | 3.45    | 0.086           | 0.144               | 1.54 [0.94-2.54] |
|                 |           |       |     | ACA+ (n=469)      | 0 (0.00)        | 32 (6.82)   | 437 (93.18)  | 3.41    | 0.053           | 0.132               | 1.52 [0.99-2.34] |
|                 |           |       |     | ATA+ (n=218)      | 0 (0.00)        | 12 (5.50)   | 206 (94.50)  | 2.75    | 0.531           | 0.663               | 1.22 [0.65-2.28] |
|                 |           |       |     | PF+ (n=217)       | 1 (0.46)        | 14 (6.45)   | 202 (93.09)  | 3.69    | 0.074           | 0.124               | 1.65 [0.95-2.88] |

\*All P-values have been calculated for the allelic model. \*\*Benjamini & Hochberg (1995) step-up FDR control correction. \*\*\*Odds ratio for the minor allele. SSc, systemic sclerosis; lcSSc, limited cutaneous SSc; dcSSc, diffuse cutaneous SSc; ACA, anti-centromere antibodies; ATA, anti-topoisomerase antibodies; M-H, Mantel-Haenszel test under fixed effect.

**Supplementary Table 4.** Genotype and minor allele frequencies (MAF) of Xq28 genetic variants in Caucasian systemic sclerosis patients and unaffected controls from United States of America.

| Locus           | rs#       | Gene  | 1/2 | Subgroup (N)     | Genotype, N (%) |             |             | MAF (%) | Allele test |                     |                  |
|-----------------|-----------|-------|-----|------------------|-----------------|-------------|-------------|---------|-------------|---------------------|------------------|
|                 |           |       |     |                  | 1/1             | 1/2         | 2/2         |         | P-value*    | P <sub>FDR</sub> ** | OR [CI 95%]***   |
| ChrX: 152937386 | rs1059702 | IRAK1 | A/G | Controls (n=487) | 19 (3.90)       | 110 (22.59) | 358 (73.51) | 15.20   |             |                     |                  |
|                 |           |       |     | SSc (n=938)      | 29 (3.09)       | 245 (26.12) | 664 (70.79) | 16.15   | 0.507       | 0.634               | 1.08 [0.87-1.33] |
|                 |           |       |     | lcSSc (n=618)    | 21 (3.40)       | 158 (25.57) | 439 (71.04) | 16.18   | 0.527       | 0.659               | 1.08 [0.85-1.36] |
|                 |           |       |     | dcSSc (n=320)    | 8 (2.50)        | 87 (27.19)  | 225 (70.31) | 16.09   | 0.626       | 0.783               | 1.07 [0.81-1.41] |
|                 |           |       |     | ACA+ (n=308)     | 6 (1.95)        | 79 (25.65)  | 223 (72.40) | 14.77   | 0.818       | 0.818               | 0.97 [0.73-1.28] |
|                 |           |       |     | ATA+ (n=172)     | 4 (2.33)        | 50 (29.07)  | 118 (68.60) | 16.86   | 0.465       | 0.774               | 1.13 [0.81-1.58] |
|                 |           |       |     | PF+ (n=82)       | 3 (3.66)        | 25 (30.49)  | 54 (65.85)  | 18.90   | 0.228       | 0.610               | 1.30 [0.85-2.00] |
| ChrX: 152957662 | rs3027935 | MECP2 | T/C | Controls (n=479) | 2 (0.42)        | 48 (10.02)  | 429 (89.56) | 5.43    |             |                     |                  |
|                 |           |       |     | SSc (n=962)      | 2 (0.21)        | 114 (11.85) | 846 (87.94) | 6.13    | 0.449       | 0.634               | 1.14 [0.81-1.59] |
|                 |           |       |     | lcSSc (n=632)    | 1 (0.16)        | 75 (11.87)  | 556 (87.97) | 6.09    | 0.508       | 0.659               | 1.13 [0.79-1.62] |
|                 |           |       |     | dcSSc (n=330)    | 1 (0.30)        | 39 (11.82)  | 290 (87.88) | 6.21    | 0.505       | 0.783               | 1.15 [0.76-1.76] |
|                 |           |       |     | ACA+ (n=316)     | 0 (0.00)        | 38 (12.03)  | 278 (87.97) | 6.01    | 0.622       | 0.818               | 1.12 [0.72-1.72] |
|                 |           |       |     | ATA+ (n=174)     | 1 (0.57)        | 15 (8.62)   | 158 (90.80) | 4.89    | 0.698       | 0.873               | 0.89 [0.51-1.57] |
|                 |           |       |     | PF+ (n=85)       | 0 (0.00)        | 10 (11.76)  | 75 (88.24)  | 5.88    | 0.811       | 0.811               | 1.09 [0.54-2.19] |
| ChrX: 152965174 | rs17435   | MECP2 | T/A | Controls (n=473) | 22 (4.65)       | 136 (28.75) | 315 (66.60) | 19.03   |             |                     |                  |
|                 |           |       |     | SSc (n=957)      | 43 (4.49)       | 317 (33.12) | 597 (62.38) | 21.06   | 0.205       | 0.634               | 1.14 [0.93-1.38] |
|                 |           |       |     | lcSSc (n=629)    | 28 (4.45)       | 207 (32.91) | 394 (62.64) | 20.91   | 0.276       | 0.659               | 1.13 [0.91-1.39] |
|                 |           |       |     | dcSSc (n=328)    | 15 (4.57)       | 110 (33.54) | 203 (61.89) | 21.34   | 0.255       | 0.783               | 1.16 [0.90-1.48] |
|                 |           |       |     | ACA+ (n=316)     | 10 (3.16)       | 106 (33.54) | 200 (63.29) | 19.94   | 0.654       | 0.818               | 1.06 [0.82-1.37] |
|                 |           |       |     | ATA+ (n=172)     | 8 (4.65)        | 50 (29.07)  | 114 (66.28) | 19.19   | 0.949       | 0.949               | 1.01 [0.74-1.38] |
|                 |           |       |     | PF+ (n=84)       | 4 (4.76)        | 29 (34.52)  | 51 (60.71)  | 22.02   | 0.366       | 0.610               | 1.20 [0.81-1.79] |
| ChrX: 152983236 | rs5987201 | MECP2 | T/C | Controls (n=486) | 2 (0.41)        | 36 (7.41)   | 448 (92.18) | 4.12    |             |                     |                  |
|                 |           |       |     | SSc (n=965)      | 1 (0.10)        | 82 (8.50)   | 882 (91.40) | 4.35    | 0.766       | 0.766               | 1.06 [0.72-1.56] |
|                 |           |       |     | lcSSc (n=634)    | 1 (0.16)        | 54 (8.52)   | 579 (91.32) | 4.42    | 0.727       | 0.727               | 1.08 [0.71-1.63] |
|                 |           |       |     | dcSSc (n=331)    | 0 (0.00)        | 28 (8.46)   | 303 (91.54) | 4.23    | 0.910       | 0.910               | 1.03 [0.63-1.69] |
|                 |           |       |     | ACA+ (n=317)     | 0 (0.00)        | 30 (9.46)   | 287 (90.54) | 4.73    | 0.554       | 0.818               | 1.16 [0.71-1.88] |
|                 |           |       |     | ATA+ (n=174)     | 0 (0.00)        | 10 (5.75)   | 164 (94.25) | 2.87    | 0.298       | 0.774               | 0.69 [0.34-1.39] |
|                 |           |       |     | PF+ (n=85)       | 0 (0.00)        | 8 (9.41)    | 77 (90.59)  | 4.71    | 0.723       | 0.811               | 1.15 [0.53-2.50] |
| ChrX: 153011951 | rs5945175 | MECP2 | C/T | Controls (n=488) | 0 (0.00)        | 41 (8.40)   | 447 (91.60) | 4.20    |             |                     |                  |
|                 |           |       |     | SSc (n=965)      | 2 (0.21)        | 93 (9.64)   | 870 (90.16) | 5.03    | 0.323       | 0.634               | 1.21 [0.83-1.75] |
|                 |           |       |     | lcSSc (n=634)    | 2 (0.32)        | 60 (9.46)   | 572 (90.22) | 5.05    | 0.347       | 0.659               | 1.21 [0.81-1.81] |
|                 |           |       |     | dcSSc (n=331)    | 0 (0.00)        | 33 (9.97)   | 298 (90.03) | 4.99    | 0.453       | 0.783               | 1.20 [0.75-1.91] |
|                 |           |       |     | ACA+ (n=317)     | 1 (0.32)        | 33 (10.41)  | 283 (89.27) | 5.52    | 0.223       | 0.818               | 1.33 [0.84-2.12] |
|                 |           |       |     | ATA+ (n=174)     | 0 (0.00)        | 11 (6.32)   | 163 (93.68) | 3.16    | 0.391       | 0.774               | 0.74 [0.38-1.47] |
|                 |           |       |     | PF+ (n=85)       | 0 (0.00)        | 10 (11.76)  | 75 (88.24)  | 5.88    | 0.327       | 0.610               | 1.43 [0.70-2.90] |

\*All P-values have been calculated for the allelic model. \*\*Benjamini & Hochberg (1995) step-up FDR control correction. \*\*\*Odds ratio for the minor allele. SSc, systemic sclerosis; lcSSc, limited cutaneous SSc; dcSSc, diffuse cutaneous SSc; ACA, anti-centromere antibodies; ATA, anti-topoisomerase antibodies; M-H, Mantel-Haenszel test under fixed effect.

**Supplementary Table 5.** Genotype and minor allele frequencies (MAF) of Xq28 genetic variants in Caucasian systemic sclerosis patients and unaffected controls from Germany.

| Locus           | rs#       | Gene  | 1/2 | Subgroup (N)     | Genotype, N (%) |             |             | MAF (%) | Allele test  |                     |                  |
|-----------------|-----------|-------|-----|------------------|-----------------|-------------|-------------|---------|--------------|---------------------|------------------|
|                 |           |       |     |                  | 1/1             | 1/2         | 2/2         |         | P-value*     | P <sub>FDR</sub> ** | OR [CI 95%]***   |
| ChrX: 152937386 | rs1059702 | IRAK1 | A/G | Controls (n=169) | 3 (1.78)        | 51 (30.18)  | 115 (68.05) | 16.86   |              |                     |                  |
|                 |           |       |     | SSc (n=475)      | 26 (5.47)       | 124 (26.11) | 325 (68.42) | 18.53   | 0.495        | 0.642               | 1.12 [0.81-1.56] |
|                 |           |       |     | lcSSc (n=301)    | 13 (4.32)       | 78 (25.91)  | 210 (69.77) | 17.28   | 0.872        | 0.872               | 1.03 [0.72-1.47] |
|                 |           |       |     | dcSSc (n=174)    | 13 (7.47)       | 46 (26.44)  | 115 (66.09) | 20.69   | 0.200        | 0.333               | 1.29 [0.88-1.89] |
|                 |           |       |     | ACA+ (n=190)     | 6 (3.16)        | 44 (23.16)  | 140 (73.68) | 14.74   | 0.435        | 0.452               | 0.85 [0.57-1.27] |
|                 |           |       |     | ATA+ (n=129)     | 9 (6.98)        | 33 (25.58)  | 87 (67.44)  | 19.77   | 0.362        | 0.603               | 1.22 [0.80-1.85] |
|                 |           |       |     | PF+ (n=121)      | 10 (8.26)       | 30 (24.79)  | 81 (66.94)  | 20.66   | 0.245        | 0.318               | 1.28 [0.84-1.96] |
| ChrX: 152957662 | rs3027935 | MECP2 | T/C | Controls (n=172) | 0 (0.00)        | 25 (14.53)  | 147 (85.47) | 7.27    |              |                     |                  |
|                 |           |       |     | SSc (n=465)      | 3 (0.65)        | 44 (9.46)   | 418 (89.89) | 5.38    | 0.203        | 0.507               | 0.73 [0.44-1.19] |
|                 |           |       |     | lcSSc (n=299)    | 3 (1.00)        | 30 (10.03)  | 266 (88.96) | 6.02    | 0.454        | 0.754               | 0.82 [0.48-1.39] |
|                 |           |       |     | dcSSc (n=166)    | 0 (0.00)        | 14 (8.43)   | 152 (91.57) | 4.22    | 0.089        | 0.223               | 0.56 [0.29-1.10] |
|                 |           |       |     | ACA+ (n=191)     | 0 (0.00)        | 20 (10.47)  | 171 (89.53) | 5.24    | 0.257        | 0.445               | 0.71 [0.38-1.29] |
|                 |           |       |     | ATA+ (n=124)     | 2 (1.61)        | 9 (7.26)    | 113 (91.13) | 5.24    | 0.321        | 0.603               | 0.71 [0.35-1.41] |
|                 |           |       |     | PF+ (n=122)      | 0 (0.00)        | 11 (9.02)   | 111 (90.98) | 4.51    | 0.169        | 0.318               | 0.60 [0.29-1.25] |
| ChrX: 152965174 | rs17435   | MECP2 | T/A | Controls (n=177) | 6 (3.39)        | 72 (40.68)  | 99 (55.93)  | 23.73   |              |                     |                  |
|                 |           |       |     | SSc (n=461)      | 34 (7.38)       | 137 (29.72) | 290 (62.91) | 22.23   | 0.568        | 0.642               | 0.92 [0.69-1.23] |
|                 |           |       |     | lcSSc (n=292)    | 23 (7.88)       | 84 (28.77)  | 185 (63.36) | 22.26   | 0.603        | 0.754               | 0.92 [0.67-1.26] |
|                 |           |       |     | dcSSc (n=169)    | 11 (6.51)       | 53 (31.36)  | 105 (62.13) | 22.19   | 0.630        | 0.651               | 0.92 [0.64-1.31] |
|                 |           |       |     | ACA+ (n=187)     | 11 (5.88)       | 54 (28.88)  | 122 (65.24) | 20.32   | 0.267        | 0.445               | 0.82 [0.58-1.17] |
|                 |           |       |     | ATA+ (n=126)     | 10 (7.94)       | 38 (30.16)  | 78 (61.90)  | 23.02   | 0.838        | 0.838               | 0.96 [0.66-1.41] |
|                 |           |       |     | PF+ (n=117)      | 8 (6.84)        | 37 (31.62)  | 72 (61.54)  | 22.65   | 0.762        | 0.762               | 0.94 [0.64-1.39] |
| ChrX: 152983236 | rs5987201 | MECP2 | T/C | Controls (n=175) | 0 (0.00)        | 23 (13.14)  | 152 (86.86) | 6.57    |              |                     |                  |
|                 |           |       |     | SSc (n=471)      | 2 (0.42)        | 30 (6.37)   | 439 (93.21) | 3.61    | <b>0.021</b> | 0.106               | 0.53 [0.31-0.92] |
|                 |           |       |     | lcSSc (n=300)    | 2 (0.67)        | 19 (6.33)   | 279 (93.00) | 3.83    | 0.058        | 0.290               | 0.57 [0.31-1.03] |
|                 |           |       |     | dcSSc (n=171)    | 0 (0.00)        | 11 (6.43)   | 160 (93.57) | 3.22    | <b>0.041</b> | 0.206               | 0.47 [0.23-0.98] |
|                 |           |       |     | ACA+ (n=194)     | 0 (0.00)        | 14 (7.22)   | 180 (92.78) | 3.61    | 0.065        | 0.327               | 0.53 [0.27-1.05] |
|                 |           |       |     | ATA+ (n=126)     | 1 (0.79)        | 6 (4.76)    | 119 (94.44) | 3.18    | 0.063        | 0.314               | 0.47 [0.21-1.06] |
|                 |           |       |     | PF+ (n=122)      | 0 (0.00)        | 7 (5.74)    | 115 (94.26) | 2.87    | <b>0.043</b> | 0.213               | 0.42 [0.18-0.99] |
| ChrX: 153011951 | rs5945175 | MECP2 | C/T | Controls (n=176) | 0 (0.00)        | 17 (9.66)   | 159 (90.34) | 4.83    |              |                     |                  |
|                 |           |       |     | SSc (n=456)      | 4 (0.88)        | 42 (9.21)   | 410 (89.91) | 5.48    | 0.642        | 0.642               | 1.14 [0.65-2.01] |
|                 |           |       |     | lcSSc (n=286)    | 3 (1.05)        | 30 (10.49)  | 253 (88.46) | 6.29    | 0.353        | 0.754               | 1.32 [0.73-2.39] |
|                 |           |       |     | dcSSc (n=170)    | 1 (0.59)        | 12 (7.06)   | 157 (92.35) | 4.12    | 0.651        | 0.651               | 0.85 [0.41-1.75] |
|                 |           |       |     | ACA+ (n=180)     | 2 (1.11)        | 18 (10.00)  | 160 (88.89) | 6.11    | 0.452        | 0.452               | 1.28 [0.67-2.46] |
|                 |           |       |     | ATA+ (n=130)     | 1 (0.77)        | 8 (6.15)    | 121 (93.08) | 3.85    | 0.558        | 0.698               | 0.79 [0.35-1.75] |
|                 |           |       |     | PF+ (n=119)      | 0 (0.00)        | 7 (5.88)    | 112 (94.12) | 2.94    | 0.255        | 0.318               | 0.60 [0.24-1.46] |

\*All P-values have been calculated for the allelic model. \*\*Benjamini & Hochberg (1995) step-up FDR control correction. \*\*\*Odds ratio for the minor allele. SSc, systemic sclerosis; lcSSc, limited cutaneous SSc; dcSSc, diffuse cutaneous SSc; ACA, anti-centromere antibodies; ATA, anti-topoisomerase antibodies; M-H, Mantel-Haenszel test under fixed effect.

**Supplementary Table 6.** Genotype and minor allele frequencies (MAF) of Xq28 genetic variants in Caucasian systemic sclerosis patients and unaffected controls from The Netherlands.

| Locus           | rs#       | Gene  | 1/2 | Subgroup (N)     | Genotype, N (%) |            |             | MAF (%) | Allele test     |                     |                  |
|-----------------|-----------|-------|-----|------------------|-----------------|------------|-------------|---------|-----------------|---------------------|------------------|
|                 |           |       |     |                  | 1/1             | 1/2        | 2/2         |         | P-value*        | P <sub>FDR</sub> ** | OR [CI 95%]***   |
| ChrX: 152937386 | rs1059702 | IRAK1 | A/G | Controls (n=263) | 8 (3.04)        | 61 (23.19) | 194 (73.76) | 14.64   |                 |                     |                  |
|                 |           |       |     | SSc (n=209)      | 9 (4.31)        | 49 (23.44) | 151 (72.25) | 16.03   | 0.555           | 0.555               | 1.11 [0.78-1.59] |
|                 |           |       |     | lcSSc (n=151)    | 7 (4.64)        | 34 (22.52) | 110 (72.85) | 15.89   | 0.627           | 0.684               | 1.10 [0.74-1.63] |
|                 |           |       |     | dcSSc (n=58)     | 2 (3.45)        | 15 (25.86) | 41 (70.69)  | 16.38   | 0.634           | 0.634               | 1.14 [0.66-1.98] |
|                 |           |       |     | ACA+ (n=57)      | 1 (1.75)        | 18 (31.58) | 38 (66.67)  | 17.54   | 0.433           | 0.715               | 1.24 [0.72-2.13] |
|                 |           |       |     | ATA+ (n=51)      | 3 (5.88)        | 14 (27.45) | 34 (66.67)  | 19.61   | 0.204           | 0.255               | 1.42 [0.82-2.45] |
|                 |           |       |     | PF+ (n=76)       | 3 (3.95)        | 20 (26.32) | 53 (69.74)  | 17.11   | 0.456           | 0.550               | 1.20 [0.74-1.96] |
| ChrX: 152957662 | rs3027935 | MECP2 | T/C | Controls (n=257) | 0 (0.00)        | 21 (8.17)  | 236 (91.83) | 4.09    |                 |                     |                  |
|                 |           |       |     | SSc (n=224)      | 2 (0.89)        | 31 (13.84) | 191 (85.27) | 7.81    | <b>0.014</b>    | 0.052               | 1.99 [1.14-3.47] |
|                 |           |       |     | lcSSc (n=162)    | 0 (0.00)        | 21 (12.96) | 141 (87.04) | 6.48    | 0.122           | 0.304               | 1.63 [0.87-3.03] |
|                 |           |       |     | dcSSc (n=62)     | 2 (3.23)        | 10 (16.13) | 50 (80.65)  | 11.29   | <b>1.56E-03</b> | <b>3.91E-03</b>     | 2.99 [1.47-6.06] |
|                 |           |       |     | ACA+ (n=60)      | 0 (0.00)        | 8 (13.33)  | 52 (86.67)  | 6.67    | 0.223           | 0.558               | 1.68 [0.72-3.88] |
|                 |           |       |     | ATA+ (n=53)      | 0 (0.00)        | 10 (18.87) | 43 (81.13)  | 9.43    | <b>0.021</b>    | <b>0.049</b>        | 2.45 [1.12-5.36] |
|                 |           |       |     | PF+ (n=82)       | 1 (1.22)        | 14 (17.07) | 67 (81.71)  | 9.76    | <b>5.38E-03</b> | <b>0.027</b>        | 2.54 [1.29-4.99] |
| ChrX: 152965174 | rs17435   | MECP2 | T/A | Controls (n=276) | 9 (3.26)        | 80 (28.99) | 187 (67.75) | 17.75   |                 |                     |                  |
|                 |           |       |     | SSc (n=226)      | 19 (8.41)       | 69 (30.53) | 138 (61.06) | 23.67   | <b>0.021</b>    | 0.052               | 1.44 [1.06-1.96] |
|                 |           |       |     | lcSSc (n=162)    | 13 (8.02)       | 46 (28.40) | 103 (63.58) | 22.22   | 0.106           | 0.304               | 1.32 [0.94-1.86] |
|                 |           |       |     | dcSSc (n=64)     | 6 (9.38)        | 23 (35.94) | 35 (54.69)  | 27.34   | <b>0.014</b>    | <b>0.023</b>        | 1.74 [1.12-2.72] |
|                 |           |       |     | ACA+ (n=63)      | 7 (11.11)       | 17 (26.98) | 39 (61.90)  | 24.60   | 0.077           | 0.386               | 1.51 [0.95-2.40] |
|                 |           |       |     | ATA+ (n=57)      | 6 (10.53)       | 23 (40.35) | 28 (49.12)  | 30.70   | <b>1.64E-03</b> | <b>8.21E-03</b>     | 2.05 [1.30-3.23] |
|                 |           |       |     | PF+ (n=80)       | 6 (7.50)        | 26 (32.50) | 48 (60.00)  | 23.75   | 0.089           | 0.149               | 1.44 [0.94-2.21] |
| ChrX: 152983236 | rs5987201 | MECP2 | T/C | Controls (n=271) | 0 (0.00)        | 18 (6.64)  | 253 (93.36) | 3.32    |                 |                     |                  |
|                 |           |       |     | SSc (n=213)      | 2 (0.94)        | 21 (9.86)  | 190 (89.20) | 5.87    | 0.056           | 0.094               | 1.82 [0.98-3.37] |
|                 |           |       |     | lcSSc (n=148)    | 0 (0.00)        | 12 (8.11)  | 136 (91.89) | 4.05    | 0.585           | 0.684               | 1.23 [0.58-2.59] |
|                 |           |       |     | dcSSc (n=65)     | 2 (3.08)        | 9 (13.85)  | 54 (83.08)  | 10.00   | <b>1.11E-03</b> | <b>3.91E-03</b>     | 3.24 [1.54-6.79] |
|                 |           |       |     | ACA+ (n=60)      | 0 (0.00)        | 5 (8.33)   | 55 (91.67)  | 4.17    | 0.647           | 0.715               | 1.27 [0.46-3.48] |
|                 |           |       |     | ATA+ (n=50)      | 0 (0.00)        | 8 (16.00)  | 42 (84.00)  | 8.00    | <b>0.029</b>    | <b>0.049</b>        | 2.53 [1.07-5.99] |
|                 |           |       |     | PF+ (n=76)       | 1 (1.32)        | 9 (11.84)  | 66 (86.84)  | 7.24    | <b>0.033</b>    | 0.082               | 2.27 [1.05-4.92] |
| ChrX: 153011951 | rs5945175 | MECP2 | C/T | Controls (n=272) | 2 (0.74)        | 26 (9.56)  | 244 (89.71) | 5.52    |                 |                     |                  |
|                 |           |       |     | SSc (n=229)      | 0 (0.00)        | 20 (8.73)  | 209 (91.27) | 4.37    | 0.406           | 0.507               | 0.78 [0.44-1.40] |
|                 |           |       |     | lcSSc (n=164)    | 0 (0.00)        | 16 (9.76)  | 148 (90.24) | 4.88    | 0.684           | 0.684               | 0.88 [0.47-1.64] |
|                 |           |       |     | dcSSc (n=65)     | 0 (0.00)        | 4 (6.15)   | 61 (93.85)  | 3.08    | 0.254           | 0.317               | 0.54 [0.19-1.57] |
|                 |           |       |     | ACA+ (n=63)      | 0 (0.00)        | 8 (12.70)  | 55 (87.30)  | 6.35    | 0.715           | 0.715               | 1.16 [0.52-2.60] |
|                 |           |       |     | ATA+ (n=53)      | 0 (0.00)        | 5 (9.43)   | 48 (90.57)  | 4.72    | 0.739           | 0.739               | 0.85 [0.32-2.24] |
|                 |           |       |     | PF+ (n=81)       | 0 (0.00)        | 7 (8.64)   | 74 (91.36)  | 4.32    | 0.550           | 0.550               | 0.77 [0.33-1.80] |

\*All P-values have been calculated for the allelic model. \*\*Benjamini & Hochberg (1995) step-up FDR control correction. \*\*\*Odds ratio for the minor allele. SSc, systemic sclerosis; lcSSc, limited cutaneous SSc; dcSSc, diffuse cutaneous SSc; ACA, anti-centromere antibodies; ATA, anti-topoisomerase antibodies; M-H, Mantel-Haenszel test under fixed effect.

**Supplementary Table 7.** Genotype and minor allele frequencies (MAF) of Xq28 genetic variants in Caucasian systemic sclerosis patients and unaffected controls from United Kingdom.

| Locus           | rs#       | Gene  | 1/2 | Subgroup (N)     | Genotype, N (%) |             |             | MAF (%) | Allele test     |                     |                  |
|-----------------|-----------|-------|-----|------------------|-----------------|-------------|-------------|---------|-----------------|---------------------|------------------|
|                 |           |       |     |                  | 1/1             | 1/2         | 2/2         |         | P-value*        | P <sub>FDR</sub> ** | OR [CI 95%]***   |
| ChrX: 152937386 | rs1059702 | IRAK1 | A/G | Controls (n=162) | 1 (0.62)        | 33 (20.37)  | 128 (79.01) | 10.80   |                 |                     |                  |
|                 |           |       |     | SSc (n=271)      | 6 (2.21)        | 57 (21.03)  | 208 (76.75) | 12.73   | 0.398           | 0.498               | 1.21 [0.78-1.86] |
|                 |           |       |     | lcSSc (n=208)    | 2 (0.96)        | 40 (19.23)  | 166 (79.81) | 10.58   | 0.922           | 0.922               | 0.98 [0.61-1.56] |
|                 |           |       |     | dcSSc (n=63)     | 4 (6.35)        | 17 (26.98)  | 42 (66.67)  | 19.84   | <b>0.011</b>    | <b>0.028</b>        | 2.04 [1.17-3.58] |
|                 |           |       |     | ACA+ (n=120)     | 0 (0.00)        | 25 (20.83)  | 95 (79.17)  | 10.42   | 0.883           | 0.883               | 0.96 [0.56-1.65] |
|                 |           |       |     | ATA+ (n=38)      | 0 (0.00)        | 11 (28.95)  | 27 (71.05)  | 14.47   | 0.367           | 0.611               | 1.40 [0.67-2.90] |
|                 |           |       |     | PF+ (n=48)       | 0 (0.00)        | 12 (25.00)  | 36 (75.00)  | 12.50   | 0.643           | 0.929               | 1.18 [0.59-2.37] |
| ChrX: 152957662 | rs3027935 | MECP2 | T/C | Controls (n=160) | 1 (0.63)        | 24 (15.00)  | 135 (84.38) | 8.13    |                 |                     |                  |
|                 |           |       |     | SSc (n=347)      | 1 (0.29)        | 38 (10.95)  | 308 (88.76) | 5.76    | 0.157           | 0.498               | 0.69 [0.41-1.16] |
|                 |           |       |     | lcSSc (n=262)    | 1 (0.38)        | 31 (11.83)  | 230 (87.79) | 6.30    | 0.313           | 0.781               | 0.76 [0.45-1.30] |
|                 |           |       |     | dcSSc (n=85)     | 0 (0.00)        | 7 (8.24)    | 78 (91.76)  | 4.12    | 0.092           | 0.153               | 0.49 [0.21-1.14] |
|                 |           |       |     | ACA+ (n=141)     | 0 (0.00)        | 17 (12.06)  | 124 (87.94) | 6.03    | 0.319           | 0.847               | 0.73 [0.39-1.37] |
|                 |           |       |     | ATA+ (n=54)      | 0 (0.00)        | 5 (9.26)    | 49 (90.74)  | 4.63    | 0.226           | 0.611               | 0.55 [0.21-1.47] |
|                 |           |       |     | PF+ (n=66)       | 0 (0.00)        | 8 (12.12)   | 58 (87.88)  | 6.06    | 0.449           | 0.929               | 0.73 [0.32-1.66] |
| ChrX: 152965174 | rs17435   | MECP2 | T/A | Controls (n=159) | 6 (3.77)        | 44 (27.67)  | 109 (68.55) | 17.61   |                 |                     |                  |
|                 |           |       |     | SSc (n=343)      | 18 (5.25)       | 102 (29.74) | 223 (65.01) | 20.12   | 0.349           | 0.498               | 1.18 [0.84-1.66] |
|                 |           |       |     | lcSSc (n=262)    | 6 (2.29)        | 78 (29.77)  | 178 (67.94) | 17.18   | 0.872           | 0.922               | 0.97 [0.67-1.40] |
|                 |           |       |     | dcSSc (n=81)     | 12 (14.81)      | 24 (29.63)  | 45 (55.56)  | 29.63   | <b>2.51E-03</b> | <b>0.013</b>        | 1.97 [1.26-3.07] |
|                 |           |       |     | ACA+ (n=141)     | 1 (0.71)        | 45 (31.91)  | 95 (67.38)  | 16.67   | 0.760           | 0.883               | 0.94 [0.61-1.43] |
|                 |           |       |     | ATA+ (n=52)      | 3 (5.77)        | 17 (32.69)  | 32 (61.54)  | 22.12   | 0.307           | 0.611               | 1.33 [0.77-2.29] |
|                 |           |       |     | PF+ (n=64)       | 2 (3.13)        | 19 (29.69)  | 43 (67.19)  | 17.97   | 0.929           | 0.929               | 1.03 [0.60-1.75] |
| ChrX: 152983236 | rs5987201 | MECP2 | T/C | Controls (n=162) | 2 (1.23)        | 17 (10.49)  | 143 (88.27) | 6.48    |                 |                     |                  |
|                 |           |       |     | SSc (n=334)      | 1 (0.30)        | 29 (8.68)   | 304 (91.02) | 4.64    | 0.223           | 0.498               | 0.70 [0.40-1.24] |
|                 |           |       |     | lcSSc (n=252)    | 1 (0.40)        | 22 (8.73)   | 229 (90.87) | 4.76    | 0.287           | 0.781               | 0.72 [0.39-1.32] |
|                 |           |       |     | dcSSc (n=82)     | 0 (0.00)        | 7 (8.54)    | 75 (91.46)  | 4.27    | 0.321           | 0.321               | 0.64 [0.27-1.55] |
|                 |           |       |     | ACA+ (n=139)     | 0 (0.00)        | 13 (9.35)   | 126 (90.65) | 4.68    | 0.339           | 0.847               | 0.71 [0.35-1.44] |
|                 |           |       |     | ATA+ (n=53)      | 0 (0.00)        | 5 (9.43)    | 48 (90.57)  | 4.72    | 0.508           | 0.635               | 0.71 [0.26-1.94] |
|                 |           |       |     | PF+ (n=59)       | 0 (0.00)        | 4 (6.78)    | 55 (93.22)  | 3.39    | 0.213           | 0.929               | 0.51 [0.17-1.51] |
| ChrX: 153011951 | rs5945175 | MECP2 | C/T | Controls (n=158) | 0 (0.00)        | 9 (5.70)    | 149 (94.30) | 2.85    |                 |                     |                  |
|                 |           |       |     | SSc (n=342)      | 0 (0.00)        | 22 (6.43)   | 320 (93.57) | 3.22    | 0.755           | 0.755               | 1.13 [0.52-2.49] |
|                 |           |       |     | lcSSc (n=259)    | 0 (0.00)        | 14 (5.41)   | 245 (94.59) | 2.70    | 0.901           | 0.922               | 0.95 [0.41-2.22] |
|                 |           |       |     | dcSSc (n=83)     | 0 (0.00)        | 8 (9.64)    | 75 (90.36)  | 4.82    | 0.265           | 0.321               | 1.73 [0.65-4.56] |
|                 |           |       |     | ACA+ (n=138)     | 0 (0.00)        | 6 (4.35)    | 132 (95.65) | 2.17    | 0.603           | 0.883               | 0.76 [0.27-2.16] |
|                 |           |       |     | ATA+ (n=53)      | 0 (0.00)        | 3 (5.66)    | 50 (94.34)  | 2.83    | 0.992           | 0.992               | 0.99 [0.26-3.74] |
|                 |           |       |     | PF+ (n=61)       | 0 (0.00)        | 4 (6.56)    | 57 (93.44)  | 3.28    | 0.812           | 0.929               | 1.16 [0.35-3.83] |

\*All P-values have been calculated for the allelic model. \*\*Benjamini & Hochberg (1995) step-up FDR control correction. \*\*\*Odds ratio for the minor allele. SSc, systemic sclerosis; lcSSc, limited cutaneous SSc; dcSSc, diffuse cutaneous SSc; ACA, anti-centromere antibodies; ATA, anti-topoisomerase antibodies; M-H, Mantel-Haenszel test under fixed effect.

**Supplementary Table 8.** Pooled-analysis of rs1059702-rs17435 allelic combinations in the global disease, diffuse cutaneous systemic sclerosis and pulmonary fibrosis data. Only haplotypes with frequency > 5% were analysed.

| Allelic combination | SSc vs controls |           |                 |                  |          | dcSSc vs controls |           |                 |                  |          | PF vs controls** |           |                 |                  |          |
|---------------------|-----------------|-----------|-----------------|------------------|----------|-------------------|-----------|-----------------|------------------|----------|------------------|-----------|-----------------|------------------|----------|
|                     | % cases         | % control | $P_{MH}$        | OR [95% CI]      | $P_{BD}$ | % cases           | % control | $P_{MH}$        | OR [95% CI]      | $P_{BD}$ | % cases          | % control | $P_{MH}$        | OR [95% CI]      | $P_{BD}$ |
| GA                  | 77.8            | 80.7      | <b>4.00E-04</b> | 0.84 [0.76-0.93] | 0.28     | 75.8              | 80.8      | <b>8.52E-05</b> | 0.77 [0.67-0.88] | 0.08     | 74.7             | 80.9      | <b>0.018</b>    | 0.81 [0.68-0.96] | 0.47     |
| AT                  | 16.0            | 14.1      | <b>6.45E-03</b> | 1.16 [1.04-1.30] | 0.97     | 17.5              | 14.1      | <b>8.76E-04</b> | 1.29 [1.11-1.49] | 0.46     | 18.5             | 13.9      | <b>4.80E-03</b> | 1.32 [1.09-1.60] | 0.85     |
| GT                  | 5.7             | 4.7       | 0.385*          | 1.14 [0.84-1.55] | 0.02     | 6.0               | 4.7       | 0.251*          | 1.27 [0.85-1.90] | 0.02     | 6.2              | 4.7       | 0.873           | 0.96 [0.70-1.33] | 0.30     |

Order of the SNPs: rs1059702-rs17435;  $P_{MH}$ , allelic Mantel-Haenszel fixed effects model  $P$ -value.;  $P_{BD}$ , Breslow-Day  $P$ -value; \*DerSimonian-Laird random effects model  $P$ -value.



**Supplementary Figure 1.** Linkage disequilibrium plot of the Xq28 genetic variants analysed in this study ( $r^2$  values are shown).

**Spain**

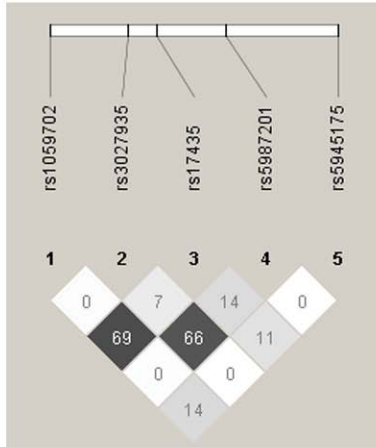

**USA**

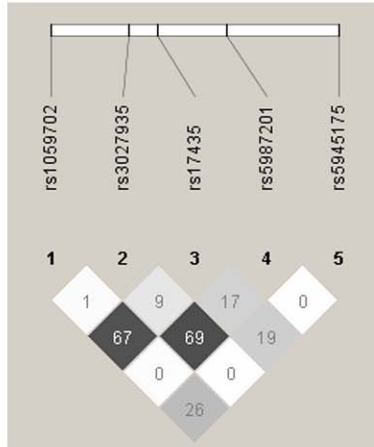

**Germany**

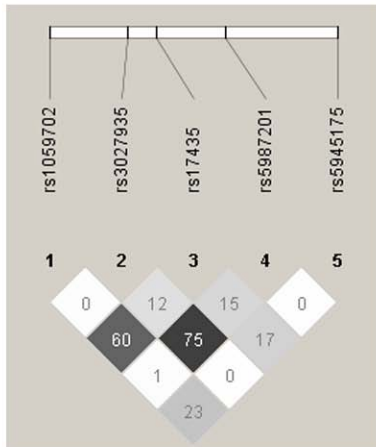

**The Netherlands**

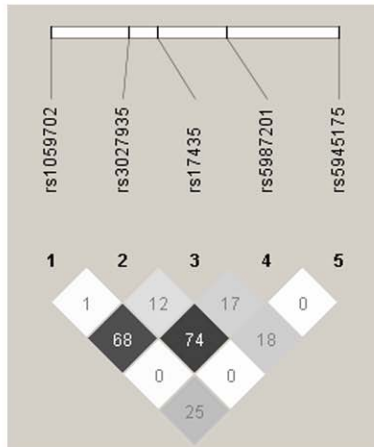

**UK**

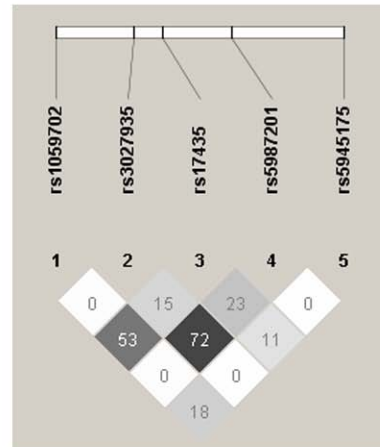

**Supplementary Figure 2.** Genomic position of the five polymorphisms included in this study. Nucleotide changes are surrounded by red circles. The image has been downloaded from the HapMap website (<http://hapmap.ncbi.nlm.nih.gov/>).

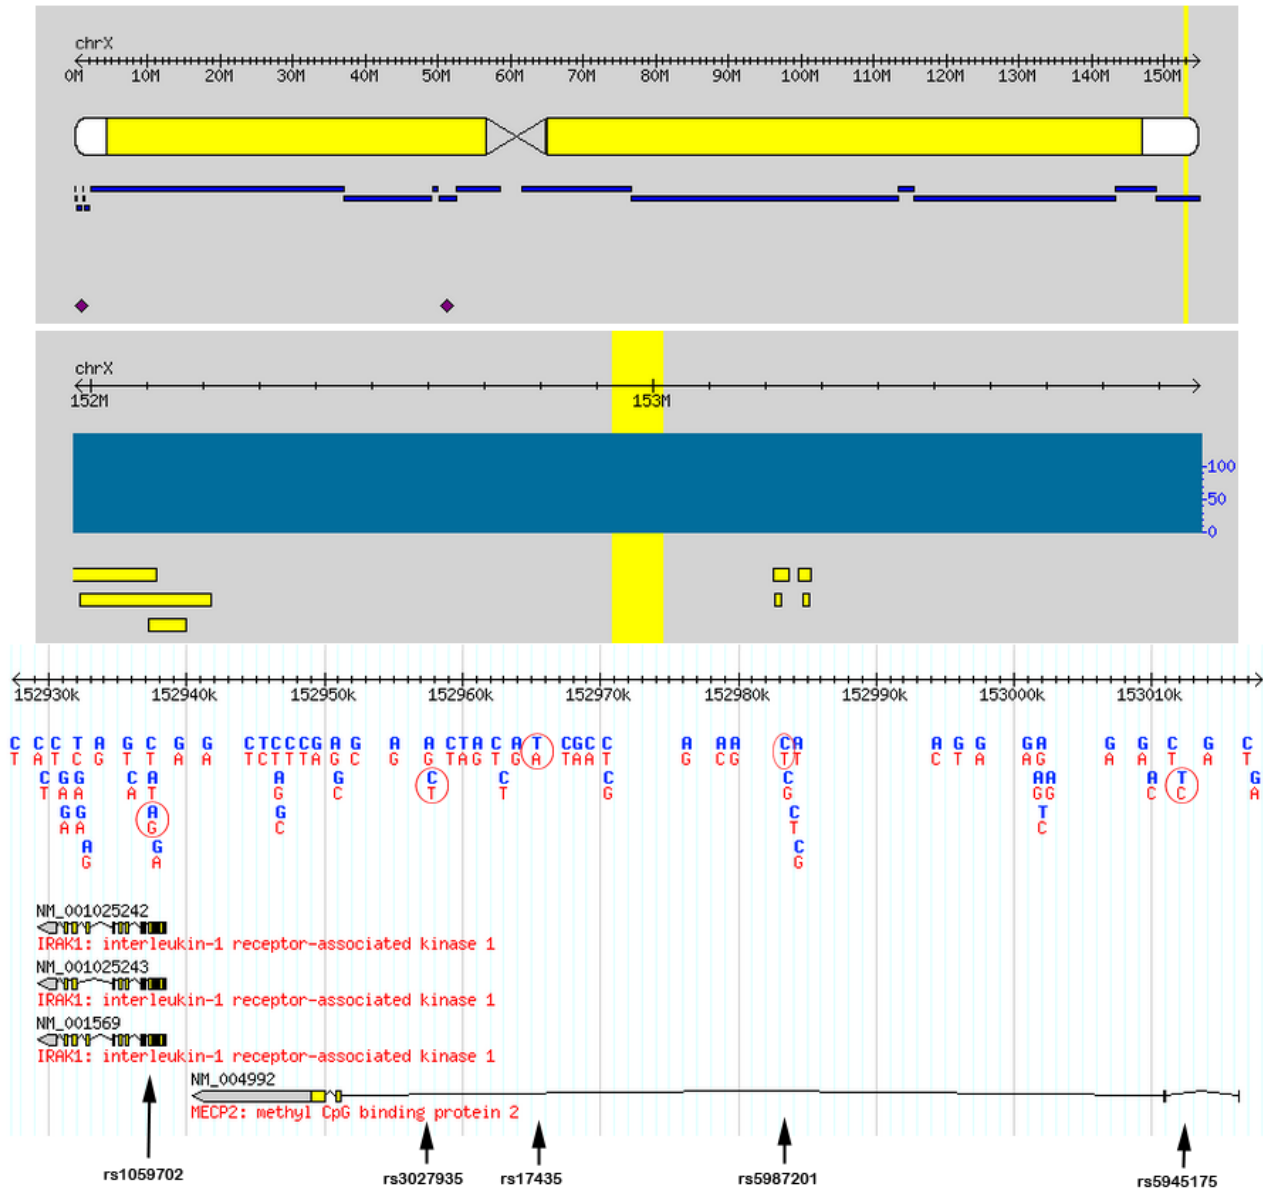

## **Supplementary Note.**

### *Spanish Scleroderma Group:*

**Norberto Ortego-Centeno** and **Raquel Ríos-Fernández**, Unidad de Enfermedades Sistémicas Autoinmunes, Servicio de Medicina Interna, Hospital Clínico Universitario San Cecilio, Granada; **Nuria Navarrete**, Servicio de Medicina Interna, Hospital Virgen de las Nieves, Granada; **Rosa García Portales**, Servicio de Reumatología, Hospital Virgen de la Victoria, Málaga; **María Teresa Camps**, Servicio de Medicina Interna, Hospital Carlos Haya, Málaga; **Antonio Fernández-Nebro**, Servicio de Reumatología, Hospital Carlos Haya, Málaga; **María F. González-Escribano**, Servicio de Inmunología, Hospital Virgen del Rocío, Sevilla; **Julio Sánchez-Román**, **José García-Hernández** and **M. Jesús Castillo**, Servicio de Medicina Interna, Hospital Virgen del Rocío, Sevilla; **M. Ángeles Aguirre** and **Inmaculada Gómez-Gracia**, Servicio de Reumatología, Hospital Reina Sofía, Córdoba; **Benjamín Fernández-Gutiérrez** and **Luis Rodríguez-Rodríguez**, Servicio de Reumatología, Hospital Clínico San Carlos, Madrid; **Esther Vicente-Rabareda**, Servicio de Reumatología, Hospital La Princesa, Madrid; **José Luis Andreu** and **Mónica Fernández de Castro**, Servicio de Reumatología, Hospital Puerta del Hierro, Madrid; **Paloma García de la Peña**, Servicio de Reumatología, Hospital Madrid Norte Sanchinarro, Madrid; **Lina Martínez**, Servicio de Reumatología, Hospital General Universitario Gregorio Marañón, Madrid; **Gerard Espinosa**, Servicio de Medicina Interna, Hospital Clinic, Barcelona; **Iván Castellví**, Servicio de Reumatología, Hospital Sant Pau, Barcelona; **Carlos Tolosa**, Servicio de Medicina Interna, Hospital Parc Taulí, Sabadell; **Anna Pros**, Servicio de Reumatología, Hospital Del Mar, Barcelona; **Mónica Rodríguez-Carballeira**, Servicio de Medicina Interna, Hospital Universitari Mútua Terrasa, Barcelona; **Francisco Javier Narváez**, Servicio de Reumatología, Hospital Universitari de Bellvitge, Barcelona; **Bernardino Díaz**, **Luis Trapiella** and **María Gallego**, Servicio de Medicina Interna, Hospital Central de Asturias, Oviedo; **María del Carmen Freire** and **Inés Vaqueiro**, Unidad de Trombosis y Vasculitis, Servicio de Medicina Interna, Hospital Xeral-Complexo Hospitalario Universitario de Vigo, Vigo; **María Victoria Egurbide**, Servicio de Medicina Interna, Hospital de Cruces, Barakaldo; **Luis Sáez-Comet**, Unidad de Enfermedades Autoinmunes Sistémicas, Servicio de Medicina Interna, Hospital Universitario Miguel Servet, Zaragoza; **Federico Díaz** and **Vanesa Hernández**, Servicio de Reumatología, Hospital Universitario de Canarias, Tenerife; **Emma Beltrán**, Servicio de Reumatología, Hospital del Doctor Peset Aleixandre, Valencia; **José Andrés Román-Ivorra**, Servicio de Reumatología, Hospital Universitari i Politecníc La Fe, Valencia. **Francisco J. Blanco** and **Natividad Oreiro**, Servicio de Reumatología, INIBIC-Hospital Universitario A Coruña, La Coruña.
